# Supplementary material for: Does acute cannabidiol (CBD) use impair performance? A meta-analysis and comparison with placebo and delta-9-tetrahydrocannabinol (THC)
Source: Neuropsychopharmacology. 2024 Mar 25;49(9):1425–36. doi: 10.1038/s41386-024-01847-w (PMC11251190; doi:10.1038/s41386-024-01847-w)
Supplement: Supplementary file 2 — eTable 5. Dependent variables by study [file 41386_2024_1847_MOESM2_ESM.xlsx]

## Sheet: Sheet1
Study	Divided Attention											Driving			Episodic memory								Executive function			Fine motor function	Information processing							Language	Multi-domain	Perception	Sensory discrimination	Subjective alertness		Subjective sedation/tired		Sustained attention		Working memory
	Divided Attention Task											On-Road		Simulated Drive	Delayed Free Recall	Hopkins Verbal Learning Test			Prose recall		Verbal Paired Associated Learning		Go/No-Go			Finger tap test	Cancellation test	Differential aptitiude test	Digit Symbol Substituition Task		Paced Serial Addition Task		Trailmaking test a	Fluency test	DRUID	Time production task	Visual Oddball Task	Subjective Drug Experience Questionnaire	Visual Analog Scale	Subjective Drug Experience Questionnaire	Visual Analog Scale	Psychomotor Vigilance Task		Digit Span Test	N-Back			Tower of London
	Greatest distance	Hits	Mean distance from stimulus	Number false alarms	Number correct	Tracking error	Reaction time	Response time	RMS distance	% over road	% targets hit	SDLP	SD Speed	SDLP	Number recalled words	Delayed recall score	Recognition discrimination index	% retained	Mean recall score	Total recall score	Average score	Correct encoding	Comission errors	Probability of inhibition	Reaction time	Number lever presses	Number correct	Number errors	Number correct	Number symbols completed	Number correct	Response time	Speed of completion	Number exemplars produced	Task score	Seconds	Reaction time	Peak score	Average score	Peak score	Average score	Reaction time	Lapses	Test score	Index of discriminability	Test accuracy	Reaction time	Number correct	Response time
Arkell et al., 2020						x		x				x	x																x		x	x									x							x	x
Arout et al., 2022																																							x		x
Bhattacharyya et al., 2009																					x																				x
Bhattacharyya et al., 2012																																					x
Bloomfield et al., 2020																			x																									x		x	x
Borgwardt et al., 2008																								x	x																x
Consroe et al., 1979																										x	x	x								x
Hindocha et al., 2018																			x				x																							x	x
Hotz et al., 2021															x																										x					x
McCartney et al., 2022		x				x	x							x															x		x	x			x				x		x	x	x
Morgan et al., 2018																			x														x	x											x		x
O’Neill et al., 2021																						x
Schoedel et al., 2018	x			x				x	x	x	x					x	x	x												x											x
Solowij et al., 2019																																									x
Spindle et al., 2020			x		x		x																						x		x	x						x		x
van de Donk et al., 2019																																									x
[truncated: 1 more columns]
